# Supplementary material for: Stability trends and tautomerization of chalcocyclopentadienes. The role of aromaticity
Source: Royal Society of Chemistry journal article supplement (doi:10.1039/c1nj20604d), 2011-01-01
Supplement: c1nj20604d.pdf [file c1nj20604d.pdf]

## **Stability trends and tautomerization of chalcocyclopentadienes. The role of aromaticity**

Marcela Hurtado, Al-Mokhtar Lamsabhi, Otilia Mó, Manuel Yáñez and Jean-Claude Guillemin

*Contribution from Departamento de Química, C-9. Universidad Autónoma de Madrid. Campus de Excelencia UAM-CSIC Cantoblanco. 28049-Madrid. Spain, and École Nationale Supérieure de Chimie de Rennes, CNRS, UMR 6226, Avenue du Général Leclerc, CS 50837, 35708 Rennes Cedex 7, France*

**Supporting Information**

**(Total number of pages 4)**

**Table S1.** Calculated Gibbs free energies (hartrees)

|    |        | $\Delta G^a$ | $\Delta G^b$ |
|----|--------|--------------|--------------|
| O  | iso1   | -269.26087   | -268.578126  |
|    | iso2-2 | -269.276363  | -268.590375  |
|    | iso3-2 | -269.277279  | -268.591346  |
| S  | iso1   | -592.240462  | -591.19169   |
|    | iso2-1 | -592.247604  | -591.196924  |
|    | iso3-1 | -592.247502  | -591.196636  |
| Se | iso1   | -2593.46115  | -2593.44468  |
|    | iso2-1 | -2593.46706  | -2593.44699  |
|    | iso3-1 | -2593.46725  | -2593.44665  |

<sup>a</sup> at B3LYP/6-31+G(d,p)

<sup>b</sup> CCSD/6-311+G(d,p)

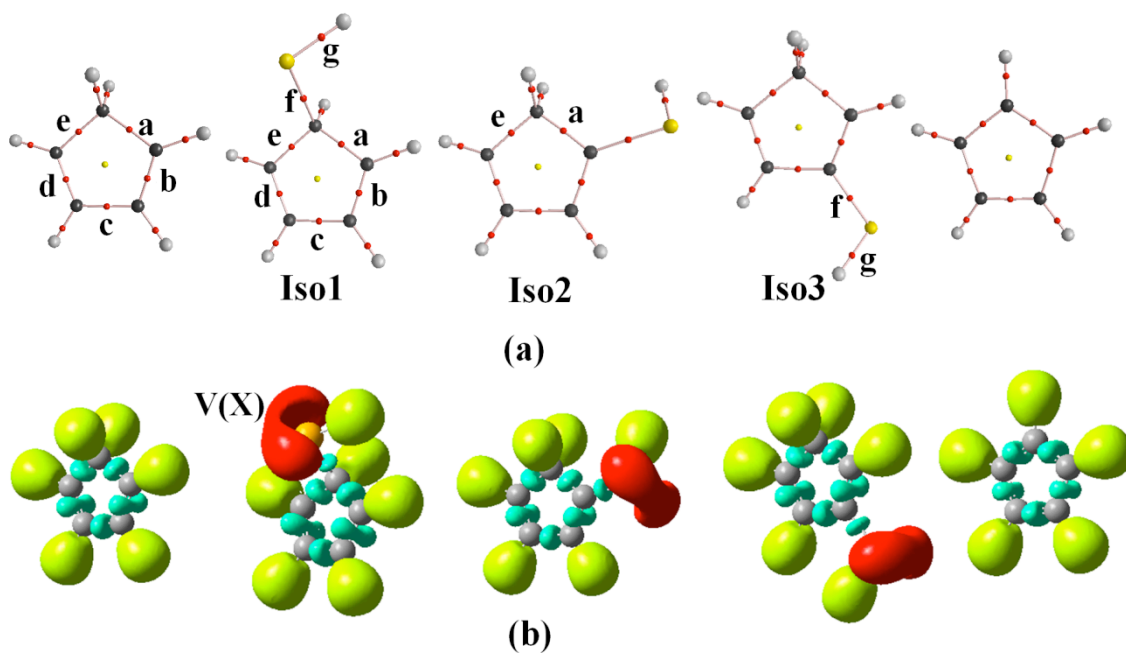

**Table S2.** Electron density (a.u.) at the BCP; **basin population** ( $e^-$ ); **bond length** ( $\text{\AA}$ ) and **bond order**, evaluated at the C-C bonds of the ring (**a**, **b**, **c**, **d** and **e**), at the C-X bond (**f**) and at the X-H bond (**g**). **V(X)** is the electron-pair basin on the heteroatom.

|                 | <b>a</b>    | <b>b</b>    | <b>c</b>    | <b>d</b> | <b>e</b> | <b>f</b> | <b>g</b> | <b>V(X)</b> |
|-----------------|-------------|-------------|-------------|----------|----------|----------|----------|-------------|
| Cyclopentadiene | 0.256       | 0.337       | 0.273       |          |          |          |          |             |
|                 | <b>1.97</b> | <b>3.44</b> | <b>2.20</b> |          |          |          |          |             |
|                 | 1.507       | 1.352       | 1.469       |          |          |          |          |             |
|                 | 1.04        | 1.81        | 1.13        |          |          |          |          |             |

|                        |                                       |                                       |                                        |                                       |                                       |                                       |                                       |             |
|------------------------|---------------------------------------|---------------------------------------|----------------------------------------|---------------------------------------|---------------------------------------|---------------------------------------|---------------------------------------|-------------|
| Cyclopentadienyl anion | 0.295<br><b>2.96</b><br>1.418<br>1.40 |                                       |                                        |                                       |                                       |                                       |                                       |             |
| O-ISO1                 | 0.256<br><b>2.04</b><br>1.519<br>1.00 | 0.339<br><b>3.43</b><br>1.347<br>1.84 | 0.269<br><b>2.160</b><br>1.479<br>1.10 | 0.340<br><b>3.46</b><br>1.346<br>1.84 | 0.260<br><b>2.04</b><br>1.511<br>1.01 | 0.254<br><b>1.26</b><br>1.427<br>0.93 | 0.365<br><b>1.71</b><br>0.966<br>0.77 | <b>4.72</b> |
| O-ISO2                 | 0.262<br><b>2.06</b><br>1.504<br>1.02 | 0.335<br><b>3.68</b><br>1.355<br>1.70 | 0.271<br><b>2.18</b><br>1.470<br>1.12  | 0.337<br><b>3.50</b><br>1.352<br>1.82 | 0.254<br><b>1.97</b><br>1.510<br>1.03 | 0.286<br><b>1.47</b><br>1.362<br>1.03 | 0.363<br><b>1.73</b><br>0.967<br>0.75 | <b>4.48</b> |
| O-ISO3                 | 0.253<br><b>1.95</b><br>1.508<br>1.03 | 0.335<br><b>3.70</b><br>1.354<br>1.70 | 0.279<br><b>2.28</b><br>1.466<br>1.10  | 0.339<br><b>3.42</b><br>1.349<br>1.82 | 0.256<br><b>1.95</b><br>1.509<br>1.04 | 0.285<br><b>1.44</b><br>1.365<br>1.02 | 0.364<br><b>1.75</b><br>0.966<br>0.76 | <b>4.53</b> |
| S-ISO1                 | 0.258<br><b>2.00</b><br>1.507<br>1.03 | 0.338<br><b>3.43</b><br>1.350<br>1.81 | 0.272<br><b>2.180</b><br>1.472<br>1.12 | 0.339<br><b>3.43</b><br>1.50<br>1.81  | 0.256<br><b>2.02</b><br>1.509<br>1.03 | 0.164<br><b>1.48</b><br>1.859<br>0.97 | 0.212<br><b>1.87</b><br>1.350<br>0.97 | <b>4.54</b> |
| S-ISO2                 | 0.253<br><b>2.00</b><br>1.513<br>1.02 | 0.334<br><b>3.53</b><br>1.356<br>1.73 | 0.274<br><b>2.20</b><br>1.466<br>1.13  | 0.337<br><b>3.43</b><br>1.352<br>1.81 | 0.256<br><b>1.95</b><br>1.508<br>1.04 | 0.194<br><b>1.82</b><br>1.771<br>1.09 | 0.212<br><b>1.85</b><br>1.351<br>0.96 | <b>4.39</b> |
| S-ISO3                 | 0.256<br><b>1.95</b><br>1.506<br>1.04 | 0.335<br><b>3.54</b><br>1.354<br>1.73 | 0.270<br><b>2.20</b><br>1.474<br>1.10  | 0.339<br><b>3.43</b><br>1.349<br>1.82 | 0.256<br><b>1.97</b><br>1.506<br>1.04 | 0.192<br><b>1.78</b><br>1.778<br>1.07 | 0.212<br><b>1.86</b><br>1.349<br>0.96 | <b>4.36</b> |
| Se-ISO1                | 0.262<br><b>2.01</b><br>1.498<br>1.05 | 0.337<br><b>3.42</b><br>1.352<br>1.79 | 0.271<br><b>2.180</b><br>1.468<br>1.13 | 0.337<br><b>3.4</b><br>1.352<br>1.80  | 0.259<br><b>2.04</b><br>1.503<br>1.04 | 0.135<br><b>1.39</b><br>1.989<br>0.92 | 0.170<br><b>1.86</b><br>1.468<br>0.98 | <b>4.91</b> |
| Se-ISO2                | 0.254<br><b>1.99</b><br>1.510<br>1.03 | 0.334<br><b>3.49</b><br>1.355<br>1.74 | 0.274<br><b>2.22</b><br>1.466<br>1.12  | 0.337<br><b>3.42</b><br>1.352<br>1.81 | 0.256<br><b>1.98</b><br>1.507<br>1.03 | 0.160<br><b>1.79</b><br>1.890<br>1.06 | 0.171<br><b>1.85</b><br>1.468<br>0.97 | <b>4.78</b> |
| Se-ISO3                | 0.255<br><b>1.94</b><br>1.506<br>1.03 | 0.334<br><b>3.55</b><br>1.353<br>1.73 | 0.271<br><b>2.21</b><br>1.471<br>1.11  | 0.339<br><b>3.46</b><br>1.349<br>1.81 | 0.257<br><b>1.97</b><br>1.505<br>1.04 | 0.160<br><b>1.77</b><br>1.894<br>1.05 | 0.172<br><b>1.86</b><br>1.463<br>0.98 | <b>4.72</b> |
| Te-ISO1                | 0.264<br><b>2.04</b><br>1.492<br>1.07 | 0.334<br><b>3.41</b><br>1.356<br>1.76 | 0.275<br><b>2.22</b><br>1.465<br>1.14  | 0.335<br><b>3.38</b><br>1.356<br>1.77 | 0.260<br><b>2.05</b><br>1.497<br>1.06 | 0.093<br><b>1.34</b><br>2.237<br>0.86 | 0.125<br><b>1.86</b><br>1.679<br>0.98 | <b>5.29</b> |
| Te-ISO2                | 0.253<br><b>1.94</b><br>1.512<br>1.03 | 0.334<br><b>3.38</b><br>1.356<br>1.77 | 0.274<br><b>2.19</b><br>1.468<br>1.12  | 0.337<br><b>3.41</b><br>1.353<br>1.81 | 0.256<br><b>1.97</b><br>1.506<br>1.03 | 0.111<br><b>1.95</b><br>2.128<br>0.98 | 0.123<br><b>1.93</b><br>1.680<br>0.97 | <b>5.18</b> |
| Te-ISO3                | 0.256<br><b>1.94</b><br>1.507<br>1.03 | 0.335<br><b>3.43</b><br>1.354<br>1.78 | 0.269<br><b>2.16</b><br>1.474<br>1.12  | 0.338<br><b>3.44</b><br>1.351<br>1.82 | 0.256<br><b>1.96</b><br>1.506<br>1.04 | 0.110<br><b>1.86</b><br>2.134<br>0.97 | 0.124<br><b>1.84</b><br>1.677<br>0.98 | <b>5.36</b> |

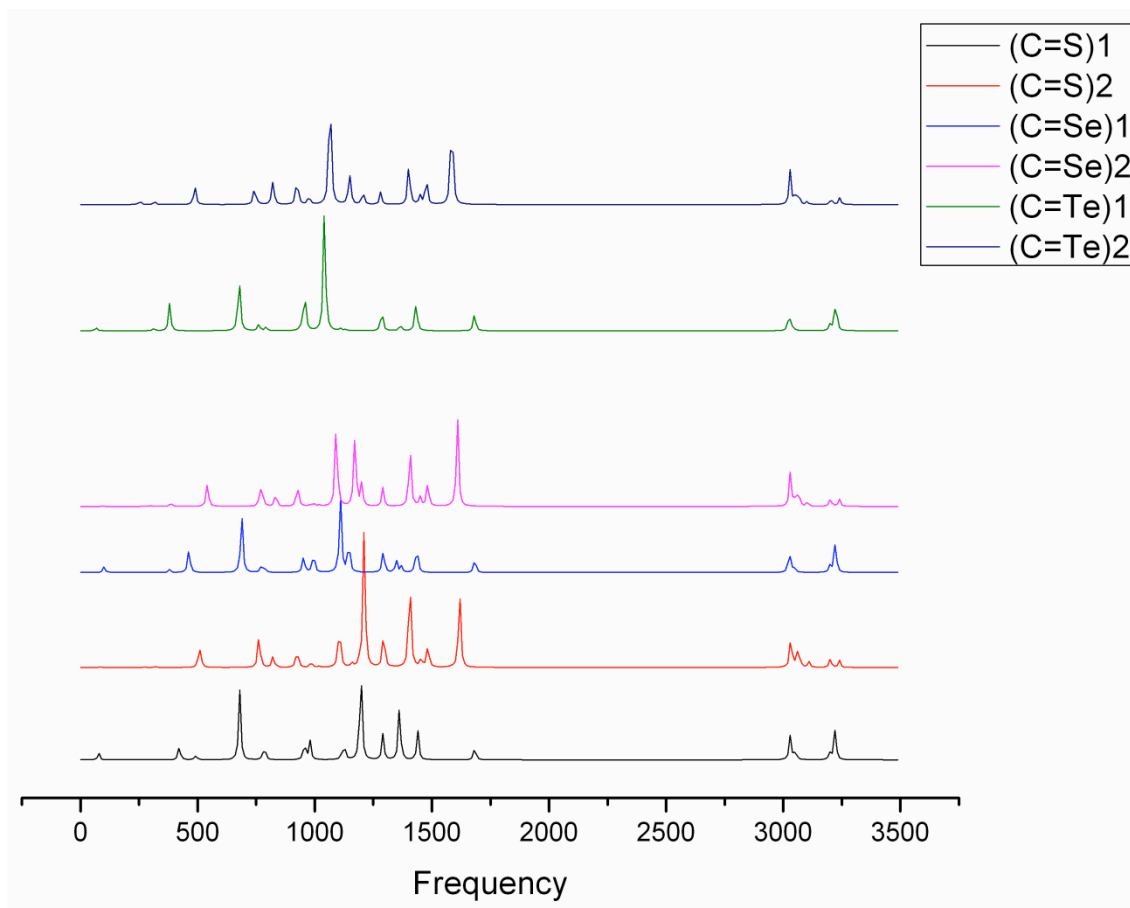

**Figure S1.** IR spectrum for the keto forms of S, Se and Te containing derivatives.  
Frequencies in  $\text{cm}^{-1}$ .
